# Supplementary material for: Elimination of Viroids from Tobacco Pollen Involves a Decrease in Propagation Rate and an Increase of the Degradation Processes
Source: PubMed Central journal article supplement (PMC7216239; doi:10.3390/ijms21083029), 2020-04-24
Supplement: ijms-21-03029-s001.pdf [file ijms-21-03029-s001.pdf]

# **Supplementary Materials: Elimination of Viroids from Tobacco Pollen Involves a Decrease in Propagation Rate and an Increase of the Degradation Processes**

Jaroslav Matoušek <sup>1</sup>, Lenka Steinbachová <sup>2</sup>, Lenka Závěská Drábková <sup>2</sup>, Tomáš Kocábek <sup>1</sup>, David Potěšil <sup>3</sup>, Ajay Kumar Mishra <sup>1</sup>, David Honys <sup>2</sup>, and Gerhard Steger <sup>4\*</sup> 

**Table S1.** Primers used for cloning, transcription templates, modification of plant vectors, strand-specific RT-qPCR and quantification of mRNA levels by RT-qPCR.

| No                             | Designation       | Sequence 5'→3'                        | Purpose                                                              | Ref. |
|--------------------------------|-------------------|---------------------------------------|----------------------------------------------------------------------|------|
| <b><i>NtAGO5</i></b>           |                   |                                       |                                                                      |      |
| 1                              | 1AGO5Start        | ATGTCGGAACGTGGACG                     | cDNA cloning                                                         |      |
| 2                              | 1AGO5Stop         | TTAGCAATAAAACATGACATCC                |                                                                      |      |
| 3                              | 1AGO5XHO          | AACTCGAGATGTCGGAACGTGGACG             |                                                                      |      |
| 4                              | 1AGO5KPN          | TTGGTACCTTAGCAATAAAACATGACATC         |                                                                      |      |
| 5                              | 1AGO5F            | CAGCCTTCATCATCACAACG                  | RT-qPCR                                                              |      |
| 6                              | 1AGO5R            | CGTCCAACAGTTCGGTATCC                  |                                                                      |      |
| <b><i>NbTFIIIA-7ZF</i></b> [1] |                   |                                       |                                                                      |      |
| 7                              | 7Z start          | ATGCAAGAGAGGCCATTG                    | cDNA cloning                                                         |      |
| 8                              | 7Z stop           | TCACAGCTCTTCATCTGATTCTG               |                                                                      |      |
| 9                              | 7Z Xho            | AACTCGAGATGCAAGAGAGGCCATTG            |                                                                      |      |
| 10                             | 7Z Bam            | AAGGATCCTCACAGCTCTTCATCTGATTCTG       |                                                                      |      |
| <b><i>NtTFIIIA</i></b>         |                   |                                       |                                                                      |      |
| 11                             | <i>NtTFIIIA_F</i> | GGAAAGATGAGGCAAATGAAG                 | RT-qPCR                                                              |      |
| 12                             | <i>NtTFIIIA_R</i> | CTTGGTGCTGCAAGAGATGTC                 |                                                                      |      |
| <b>AFCVd</b>                   |                   |                                       |                                                                      |      |
| 13                             | AFCVdRTPL         | TCGTCGACGACGAGTCCACAGGTG              | cDNA synthesis & reverse transcription                               | [2]  |
| 14                             | AFCVdRTMI         | GTGACTCGTCGTCGACGAAGGGTC              |                                                                      | [2]  |
| 15                             | AFCVd PCR FOR     | CCGGTCGTGGATACCTAGGA                  | RT-qPCR                                                              | [2]  |
| 16                             | AFCVd PCR REV     | ACGCGGCCTTCGGTGTG                     |                                                                      | [2]  |
| 17                             | AFCVd <i>I</i> sa | CGTCGACGAAGGGTCCTCAG                  | Reverse transcription & cDNA library                                 | [2]  |
| 18                             | AFCVd <i>I</i> sa | TTGTCGACGACGAGTCCACC                  |                                                                      | [2]  |
| 19                             | AFCVd start       | TGGGCTCCAAGTCTAGTGGTTC                | cDNA amplification & with T7 promoter for strand-specific RNA probes |      |
| 20                             | AFCVd T7 start    | TAATACGACTCACTATAGGGTCCAAGTCTAGTGGTTC |                                                                      |      |
| 21                             | AFCVd stop        | GGGCACCCAAACAAGGG                     |                                                                      |      |
| 22                             | AFCVd T7 stop     | TAATACGACTCACTATAGGGCACCCAAACAAGGG    |                                                                      |      |
|                                |                   |                                       |                                                                      |      |
| <b>pFASTbZIP18 adaptor</b>     |                   |                                       |                                                                      |      |
| 23                             | Xho_ada_Kpn       | AAGGTACCGTTCATTTCTGAGAGGACCTCG        | modification of pFASTbZIP18                                          |      |
| 24                             | Xba_ada_KpnI      | TTGGTACCAGAGACTGGTATTGCGGACTCTAG      |                                                                      |      |
| <b>CBCVd</b>                   |                   |                                       |                                                                      |      |
| 25                             | CVdRTPL           | AAGCCTGGGAGGAACAACCCAAGAG             | cDNA synthesis & reverse transcription                               | [2]  |
| 26                             | CVdRTMI           | GGATCCCCGGGAAATCTCTTCAG               |                                                                      |      |
| 27                             | CVd PCR FOR       | TCACTGGCGTCCAGACC                     | RT-qPCR                                                              | [2]  |
| 28                             | CVd PCR REV       | AGGAAGAAGCGACGATCGG                   |                                                                      | [2]  |
| 29                             | CVd start         | CTGGGAATTTCTCTGCG                     | cDNA amplification & with T7 promoter for strand-specific RNA probes | [2]  |
| 30                             | CVd T7 start      | TAATACGACTCACTATAGGGAATTTCTCTGCG      |                                                                      | [2]  |
| 31                             | CVd stop          | GGGTCTCAAAGCGGGC                      |                                                                      | [2]  |
| 32                             | CVd T7 stop       | TAATACGACTCACTATAGGGTCTCAAAGCGGGC     |                                                                      | [2]  |
|                                |                   |                                       |                                                                      |      |
| 33                             | CVds I            | AAGAGCTCCTGTTCGGTGCTG                 | reverse transcription                                                | [2]  |

continued on next page

**Table S1** – continued from previous page

| No                                                    | Designation         | Sequence 5'→3'                                  | Purpose                    | Ref. |
|-------------------------------------------------------|---------------------|-------------------------------------------------|----------------------------|------|
| 34                                                    | CVds II             | AAGAGCTCGTCTCCTTCCTCC                           |                            | [2]  |
| <b><i>NtRPL5</i> tobacco homologues</b>               |                     |                                                 |                            |      |
| 35                                                    | <i>NtRPL5</i> -F    | ATGGCATTTCATCAAAGTCCAG                          | RT-qPCR                    |      |
| 36                                                    | <i>NtRPL5</i> -R    | GTGATGCATAAGCTGATGAGCG                          |                            |      |
| <b><i>NtDICER</i>-like homologues</b>                 |                     |                                                 |                            |      |
| 37                                                    | pollenDcl-F         | GAGTGCATGAAACATATGATACAG                        | RT-qPCR                    |      |
| 38                                                    | pollenDcl-R         | GAGAACTCTCAAGAAGCMTTGA                          |                            |      |
| <b><i>At5bZip18</i></b>                               |                     |                                                 |                            |      |
| 39                                                    | <i>At5Zip18</i> -F  | CATCATCATCAGCAACAACCG                           | RT-qPCR                    | [3]  |
| 40                                                    | <i>At5Zip18</i> -R  | GTGATGCATAAGCTGATGAGCG                          |                            |      |
| <b>GFP</b>                                            |                     |                                                 |                            |      |
| 41                                                    | GFP-F1              | CAAGAGCGCCATGCCTGAG                             | RT-qPCR                    | [4]  |
| 42                                                    | GFP-R1              | CGTGTCTTGTAGTCCCGTCGTC                          |                            |      |
| <b><i>NtTUDOR S1</i>-like nuclease (<i>NtTSN</i>)</b> |                     |                                                 |                            |      |
| 43                                                    | TunucF              | GTGGATGAGCCATTTCATG                             | RT-qPCR                    |      |
| 44                                                    | TunucR              | GATGCCTCAGAAGCACCAGG                            |                            |      |
| <b>HS link</b>                                        |                     |                                                 |                            |      |
| 45                                                    | HS link sens        | TAAGCTTCCCGGGTTAATTAACCTCGAGGTACCGGCGCCTGCAGGAA | Plant vector pBin-35S-GFP5 |      |
| 46                                                    | HS link anti        | TTCTGTCAGGCGCGCGGTACCTCGAGTTAATTAACCGGGAAGCTTA  | modification               |      |
| <b><i>Hlchs_H1</i> promoter 600</b>                   |                     |                                                 |                            |      |
| 47                                                    | <i>PchsH1</i> Pac   | AATTAATTAAGATCAGCACCCTCCATTC                    | Construction of            |      |
| 48                                                    | <i>Pchs1end</i> Xho | AACTCGAGCATTTTTCCTTTAGTTTCGGA                   | vector pJM13 and<br>pJM14  |      |
| <b><i>NtACTIN</i></b>                                 |                     |                                                 |                            |      |
| 49                                                    | ACT-F1              | TTCTGTTCCAACCATCAATGA                           | RT-qPCR                    |      |
| 50                                                    | ACT-R1              | GTACCACCACTGAGGACAATGT                          |                            |      |
| <b>7SL RNA</b>                                        |                     |                                                 |                            |      |
| 51                                                    | primer $\alpha$     | TGTAACCCAAGTGGGG                                | Reverse transcription      |      |
| 52                                                    | anti- $\beta$       | GCACCGGCCCTTATCC                                | and RT-qPCR                | [6]  |

**Table S2.** Influence of TFIIIA-7ZF on complex activation of promoters in transient expression system.

| Promoter                  | Activators             | Activation units <sup>a</sup><br>(pmol of MU/ min / mg) | Activation/suppression<br>levels with TFIIIA-7ZF (%) <sup>b</sup> |
|---------------------------|------------------------|---------------------------------------------------------|-------------------------------------------------------------------|
| pCHS_H1 1000 <sup>c</sup> | WW <sup>d</sup>        | 69 ± 0.1                                                | 121                                                               |
|                           | M2BW <sup>e</sup>      | 1091 ± 118                                              | 83                                                                |
|                           | WW+p19 <sup>df</sup>   | 3490 ± 713                                              | 91                                                                |
|                           | M2BW+p19 <sup>ef</sup> | 5937 ± 1989                                             | 87                                                                |
| pCHS4 <sup>g</sup>        | WW <sup>d</sup>        | 27 ± 1.6                                                | 162                                                               |
|                           | M2BW <sup>e</sup>      | 7 ± 0.4                                                 | 79                                                                |
|                           | WW+p19 <sup>df</sup>   | 1142 ± 87.9                                             | 254                                                               |
|                           | M2BW+p19 <sup>ef</sup> | 227 ± 10.1                                              | 140                                                               |
| pWRKY1 <sup>c</sup>       | WW <sup>d</sup>        | 24 ± 1.1                                                | 108                                                               |
|                           | M2BW <sup>e</sup>      | 3 ± 0.5                                                 | 100                                                               |
|                           | WW+p19 <sup>df</sup>   | 422 ± 9.6                                               | 63                                                                |
|                           | M2BW+p19 <sup>ef</sup> | 44 ± 1.4                                                | 149                                                               |

<sup>a</sup> GUS activation units were determined by three independent measurements, as described in Material and Methods, 3.5 days after co-infiltration of promoter and activators in young *N. benthamiana* leaves. The numbers indicate pmol of MU per min per 1 mg of fresh tissue ±SD.

<sup>b</sup> Activation or suppression was determined after co-expression of bacterial strain bearing TFIIIA-7ZF with promoters and activators in the transient expression system; GUS activity level without TFIIIA-7ZF was set to 100 %.

<sup>c</sup> Promoter pCHS\_H1 in hop was described by Matoušek et al. [5].

<sup>d</sup> Activation complex WW (*HIWRKY1/HIWDR1*) was described by Matoušek et al. [7].

<sup>e</sup> Activation complex M2BW (*HIMyb2/bHLH2/HIWDR1*) was described by Matoušek et al. [5].

<sup>f</sup> p19 is a silencing suppressor described e. g. by Baulcombe and Molnár [8].

<sup>g</sup> Promoter pCHS4 in hop was described by Matoušek et al. [5].

a

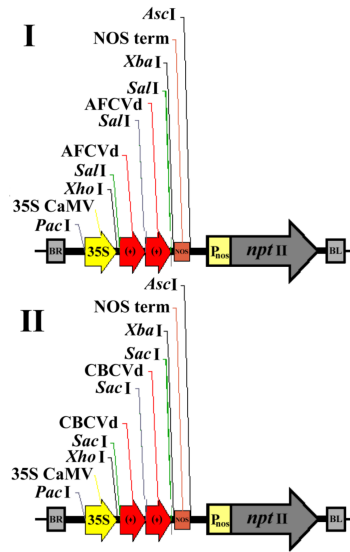

b

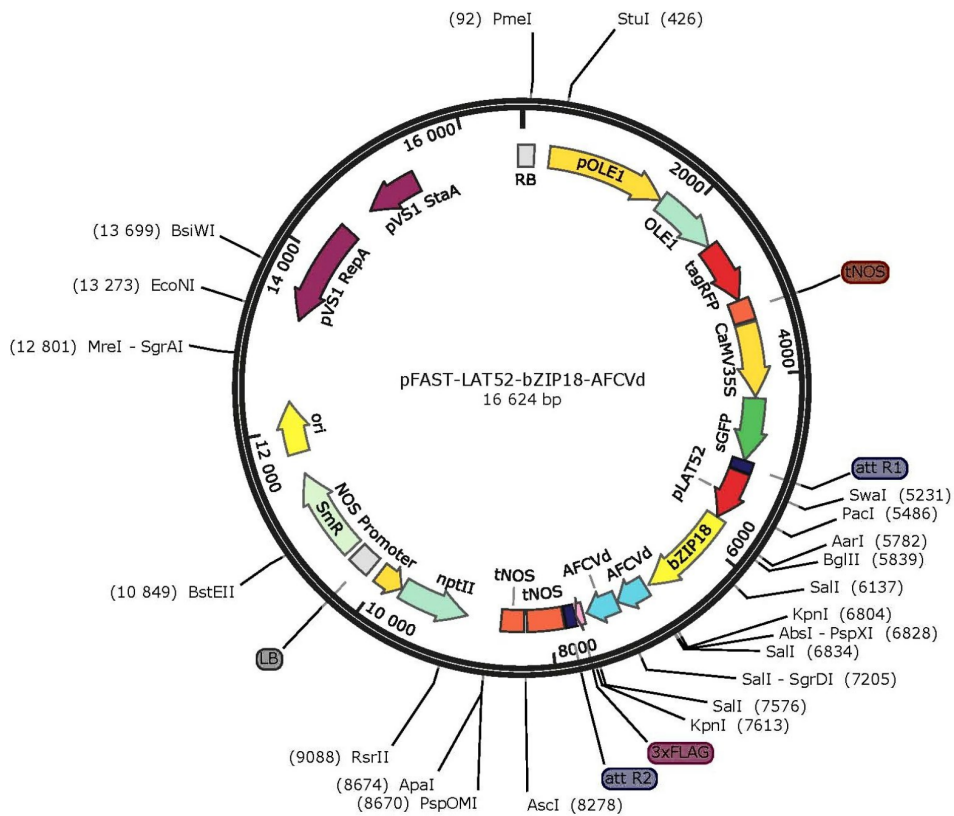

**Figure S1.** Plant vector cassettes used for transformation of *N. tabacum*. (a) AFCVd (I) and CBCVd (II) infectious dimeric (++) cDNAs of corresponding viroids integrated in modified expression cassettes containing CaMV 35S promoter and NOS terminator that were constructed as described previously [7] and cloned via *PacI* and *AscI* to plant vector pLV07 [7]. (b) Plant vector pFAST bearing late pollen-specific promoter pLAT52. Infectious (++) dimer of AFCVd is integrated via specific adapter (Table S1) in unique *KpnI* restriction site downstream of bZIP18 gene under pLAT52. The final vectors were transformed to *Agrobacterium* LBA4404 and used for transformation. The schemes are not in scale.

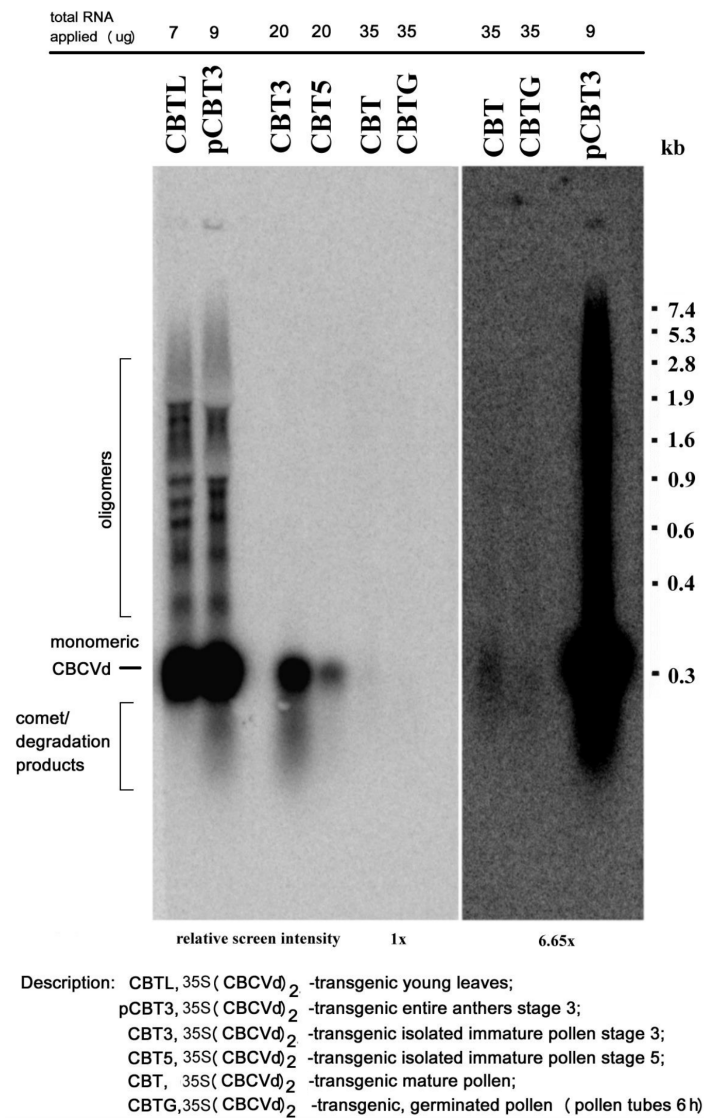

**Figure S2.** Northern blot analysis of CBCVd intermediates. Total RNA isolated from 35S:CBVd-transformed tobacco leaves, anthers and pollen in amounts as indicated in the figure was electrophoresed in denaturing 1.5% agarose gel and capillary transblotted to Biodine A Nylon membrane. Samples were hybridized to [<sup>32</sup>P-dCTP]-labeled CBCVd cDNA as described in Material and Methods. Membranes were scanned after 24 h exposure, relative screen intensification is given in the bottom of the figure. The positions of CBCVd monomers, longer-than-unit-length RNA and comet degradation products are indicated on the left of the panel. Positions of RNA III marker (Boehringer Mannheim) is indicated on the right side of the panel.

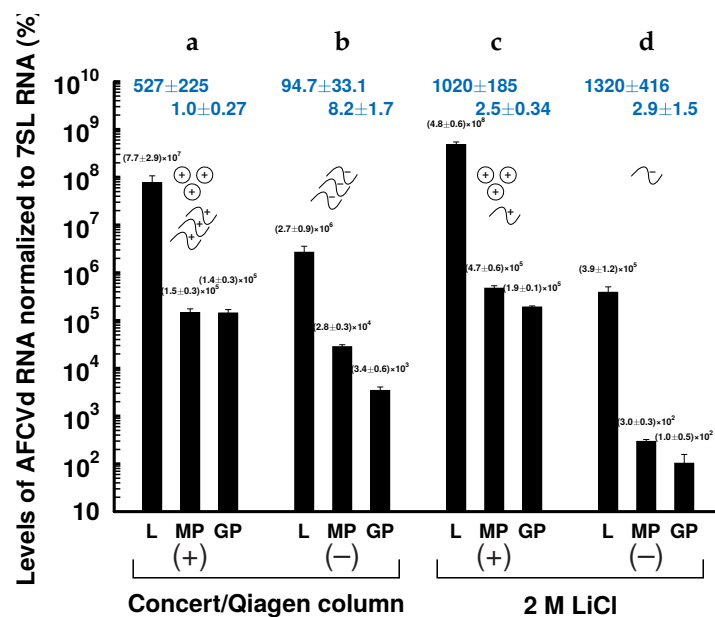

**Figure S3.** Comparative analysis of levels of AFCVd strands in leaves (L) versus mature (MP) and germinating pollen (GP) in plants transformed with pLAT52:AFCVd vector. Relative levels are given in percents after normalization to 7SL RNA. Reference level of (-) AFCVd strands in infected germinating tobacco pollen (the lowest level as in Figure 3) was taken as 100%. Samples in **a** and **b** were purified by Concert reagent and through Qiagen columns, whereas samples in **c** and **d** were additionally concentrated from 2 M-LiCl soluble RNA (see Materials and Methods). Long replication intermediates and circular viroids were present in total RNA extracts (**a** and **b**), while replication intermediates are mostly non-soluble in 2 M LiCl (**c** and **d**); this feature is symbolized by the cartoons. Ratios of RNA levels are given in blue.

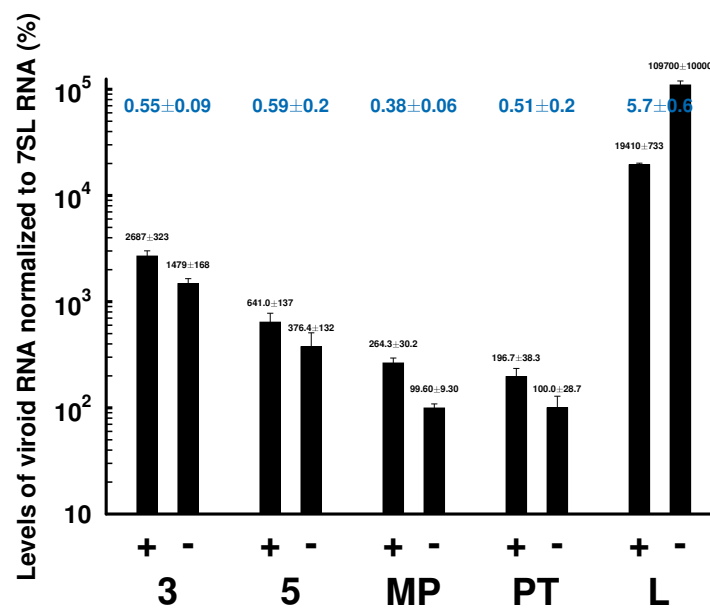

**Figure S4.** Comparative analysis of CBCVd (+) and (-) RNA levels in leaves (L) versus developing (stage 3 and 5), mature (MP) and germinating pollen (PT) in plants transformed with 35S:CBCVd vector. Relative levels are given in percents after normalization to 7SL RNA. Reference level of (-) CBCVd strands in transformed/infected germinating tobacco pollen (the lowest level) was set to 100 %. RNA was isolated by plant reagent and purified using Qiagen purification protocol and analyzed by strand-specific RT-qPCR (see Material and Methods). Ratios (-) to (+) chains are given for individual tissues in blue.



**Table S3.** Overview of all smallRNA sequence data sets before and after the preprocessing. Raw reads represent the amount of all sequenced reads; cleaned reads represent the amount of remaining reads after the trimming step by TRIMMOMATIC [9]. The percentages refer to the amount of raw reads. Sample abbreviations are as follows: L, K, V, leaves, control/healthy, AFCVd-infected, respectively; 3, 5, pollen, stages 3 and 5, respectively; Z, LAT52:AFCVd-transformed/infected; TG, pollen tubes; -1, -2, biological replicates.

| sample | raw reads  | clean reads |        |
|--------|------------|-------------|--------|
| L      | 11,287,184 | 6,541,037   | (58 %) |
| K3-1   | 9,453,310  | 7,371,330   | (78 %) |
| K3-2   | 11,507,521 | 8,794,233   | (76 %) |
| V3-1   | 13,447,045 | 11,249,018  | (84 %) |
| V3-2   | 9,725,947  | 6,231,046   | (64 %) |
| K5-1   | 10,101,327 | 6,498,730   | (64 %) |
| K5-2   | 9,751,223  | 7,545,789   | (77 %) |
| V5-1   | 9,053,045  | 5,455,233   | (60 %) |
| V5-2   | 15,718,151 | 8,584,379   | (55 %) |
| ZL-1   | 19,316,194 | 7,364,597   | (38 %) |
| ZL-2   | 12,557,978 | 5,532,267   | (44 %) |
| ZTG-1  | 13,886,704 | 5,564,001   | (40 %) |
| ZTG-2  | 13,211,578 | 8,368,058   | (63 %) |

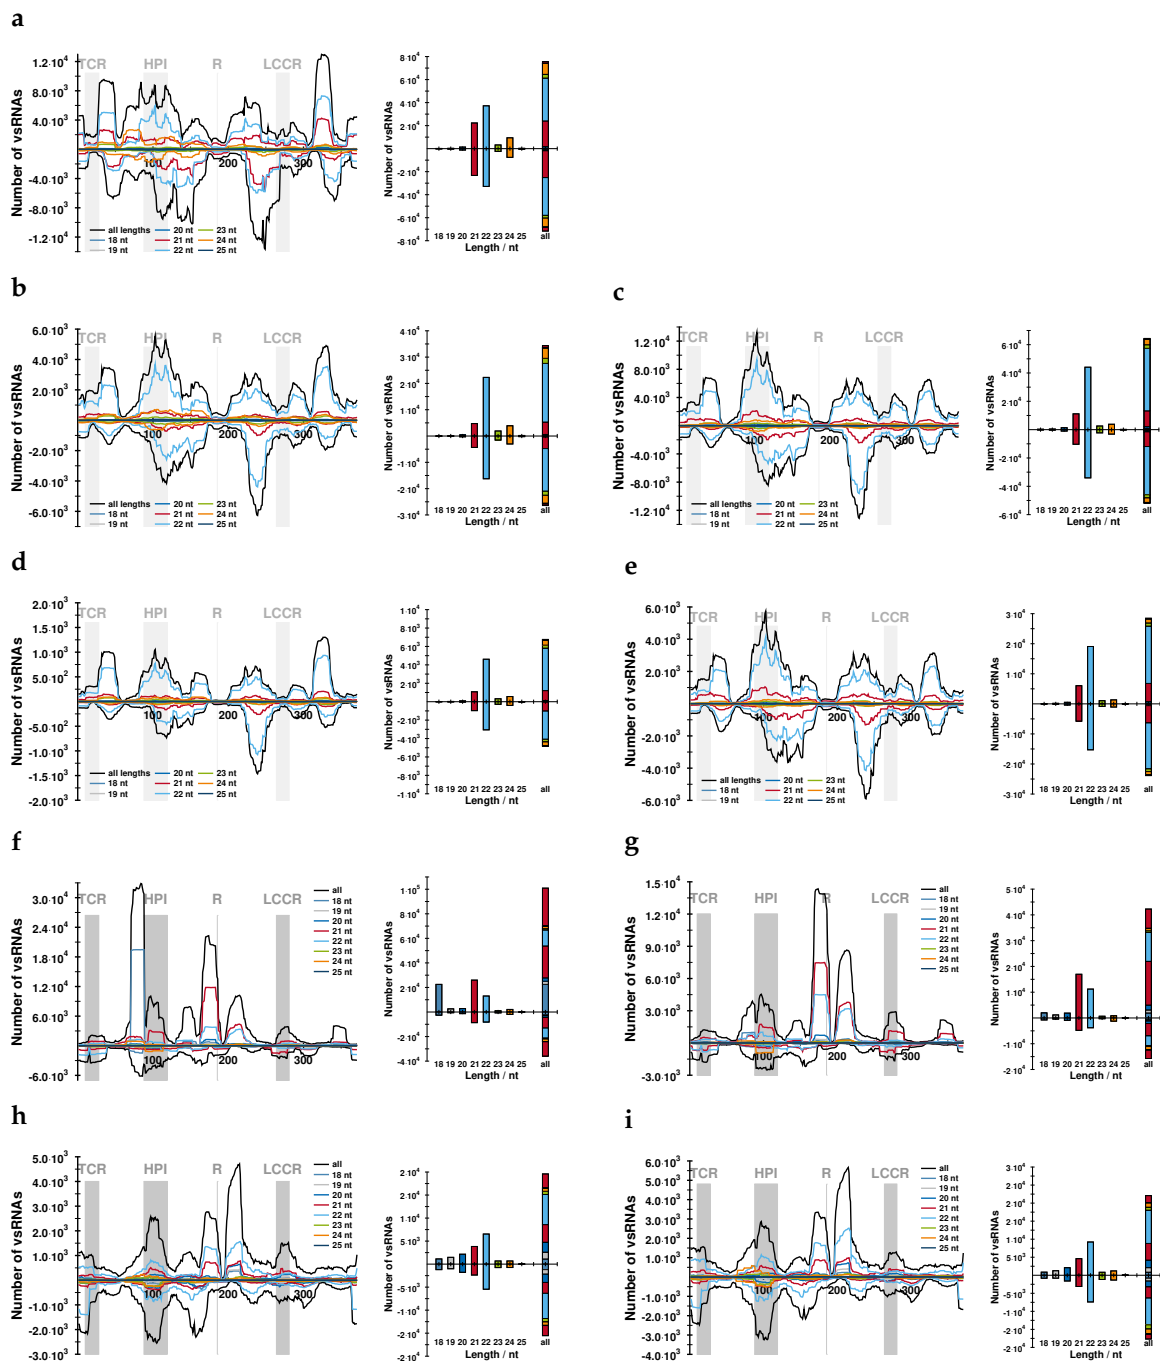

**Figure S5.** Mapping of vd-sRNA to the AFCVd genome and length distribution of vd-sRNA. Total RNA was isolated from infected leaves (a), infected pollen stages 3 (b,c) and 5 (d,e), and LAT52:AFCVd transgenic leaves (f,g) and LAT52:AFCVd transgenic pollen tubes (h,i) including biological replicates, purified and subjected to NGS; BOWTIE [10] allowing for one mismatch was used for mapping. For further details see Figure 6.

**Table S4.** Percentage of AFCVd mutations according to NGS. Total RNA was isolated from infected leaves (L), infected pollen stages 3 (V3-1, V3-2) and 5 (V5-1, V5-2), and LAT52:AFCVd transgenic leaves (ZL1, ZL2) and LAT52:AFCVd transgenic pollen tubes (ZTG1, ZTG2) including biological replicates, purified, subjected to NGS; bowtie allowing for one mismatch was used for mapping. Mutations are given if the ratio  $\frac{\text{number of vd-sRNA with 1 error}}{\text{total number of vd-sRNA}} \cdot 100 > 10$ . For further details see Figures 6 and S6.

| Position | Mutation | L   |     | V3-1 |     | V3-2 |     | V5-1 |     | V5-2 |     | ZL1 |     | ZL2 |     | ZTG1 |     | ZTG2 |     |
|----------|----------|-----|-----|------|-----|------|-----|------|-----|------|-----|-----|-----|-----|-----|------|-----|------|-----|
|          |          | (+) | (-) | (+)  | (-) | (+)  | (-) | (+)  | (-) | (+)  | (-) | (+) | (-) | (+) | (-) | (+)  | (-) | (+)  | (-) |
| 67       | G→U      | 80  | 76  | 32   | 34  | 69   | 61  | 41   | 49  | 62   | 46  | 13  | 32  | 22  | 40  | 0    | 0   | 0    | 0   |
| 77       | G→A      | 10  | 9   | 62   | 41  | 35   | 18  | 39   | 13  | 40   | 18  | 85  | 17  | 12  | 3   | 3    | 2   | 8    | 0   |
| 196      | U→C      | 12  | 6   | 7    | 3   | 7    | 1   | 0    | 0   | 4    | 1   | 24  | 0   | 33  | 0   | 21   | 3   | 24   | 1   |
| 207      | U→A      | 4   | 22  | 39   | 30  | 24   | 20  | 48   | 39  | 51   | 45  | 78  | 50  | 76  | 45  | 70   | 52  | 71   | 61  |
| 306      | C→A      | 12  | 65  | 9    | 20  | 30   | 47  | 26   | 46  | 26   | 57  | 6   | 1   | 8   | 3   | 0    | 0   | 0    | 0   |
|          | C→U      | 3   | 5   | 9    | 16  | 16   | 28  | 10   | 17  | 20   | 22  | 2   | 0   | 1   | 1   | 0    | 0   | 0    | 0   |
| 309      | A→U      | 98  | 99  | 99   | 99  | 94   | 96  | 100  | 100 | 93   | 89  | 59  | 78  | 21  | 34  | 33   | 41  | 27   | 38  |
|          | A→C      | 0   | 0   | 0    | 0   | 6    | 3   | 0    | 0   | 7    | 10  | 36  | 21  | 65  | 64  | 65   | 53  | 68   | 55  |

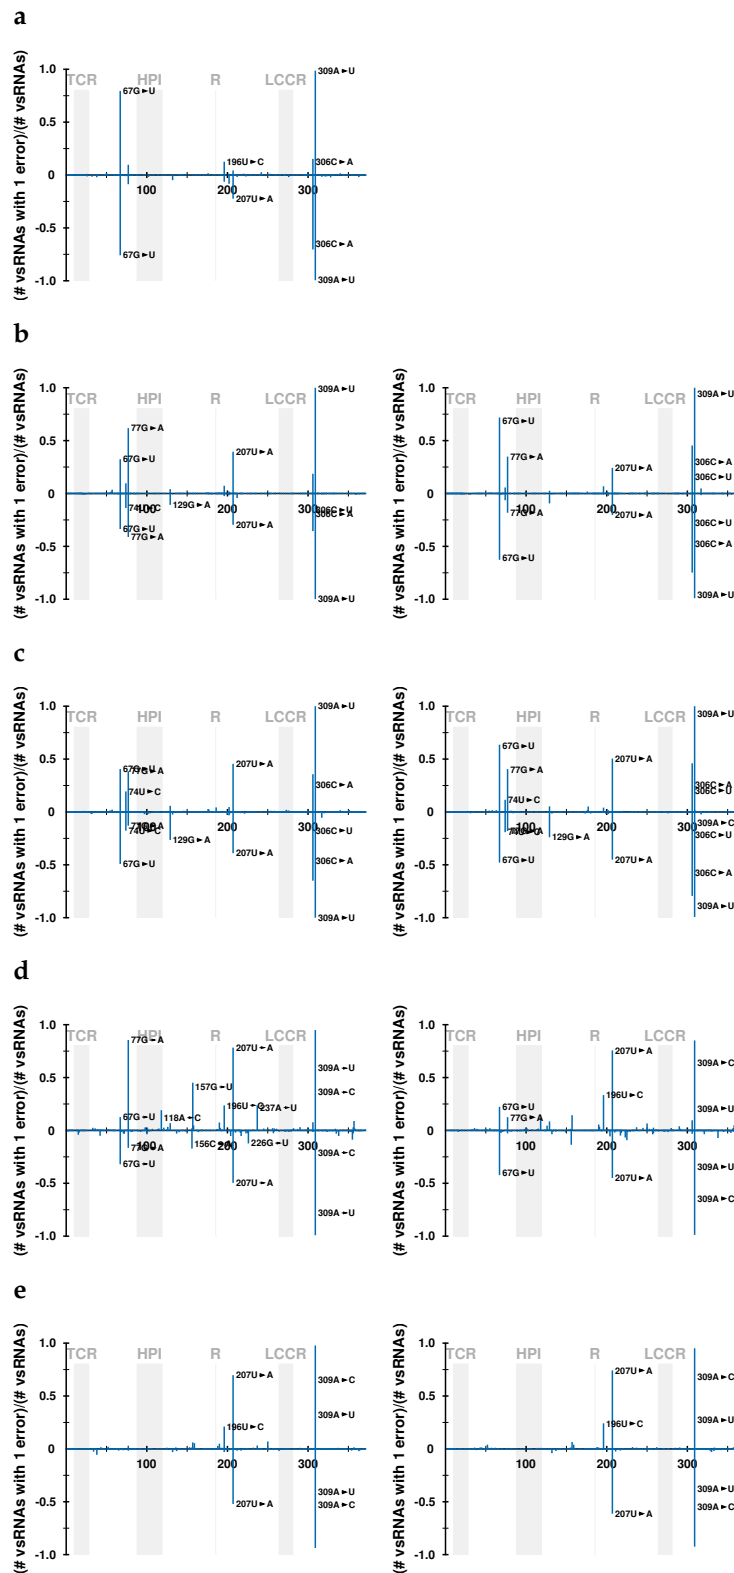

**Figure S6.** Position of mutations in the AFCVd genome according to vd-sRNAs. Total RNA was isolated from infected leaves (a), infected pollen stages 3 (b) and 5 (c), and LAT52:AFCVd transgenic leaves (d) and LAT52:AFCVd transgenic pollen tubes (e) including biological replicates, purified and subjected to NGS; bowtie allowing for one mismatch was used for mapping. Positions of mutations are labeled if the ratio  $\frac{\text{number of vd-sRNA with 1 error}}{\text{total number of vd-sRNA}} > 0.1$ . For further details see Figure 6.

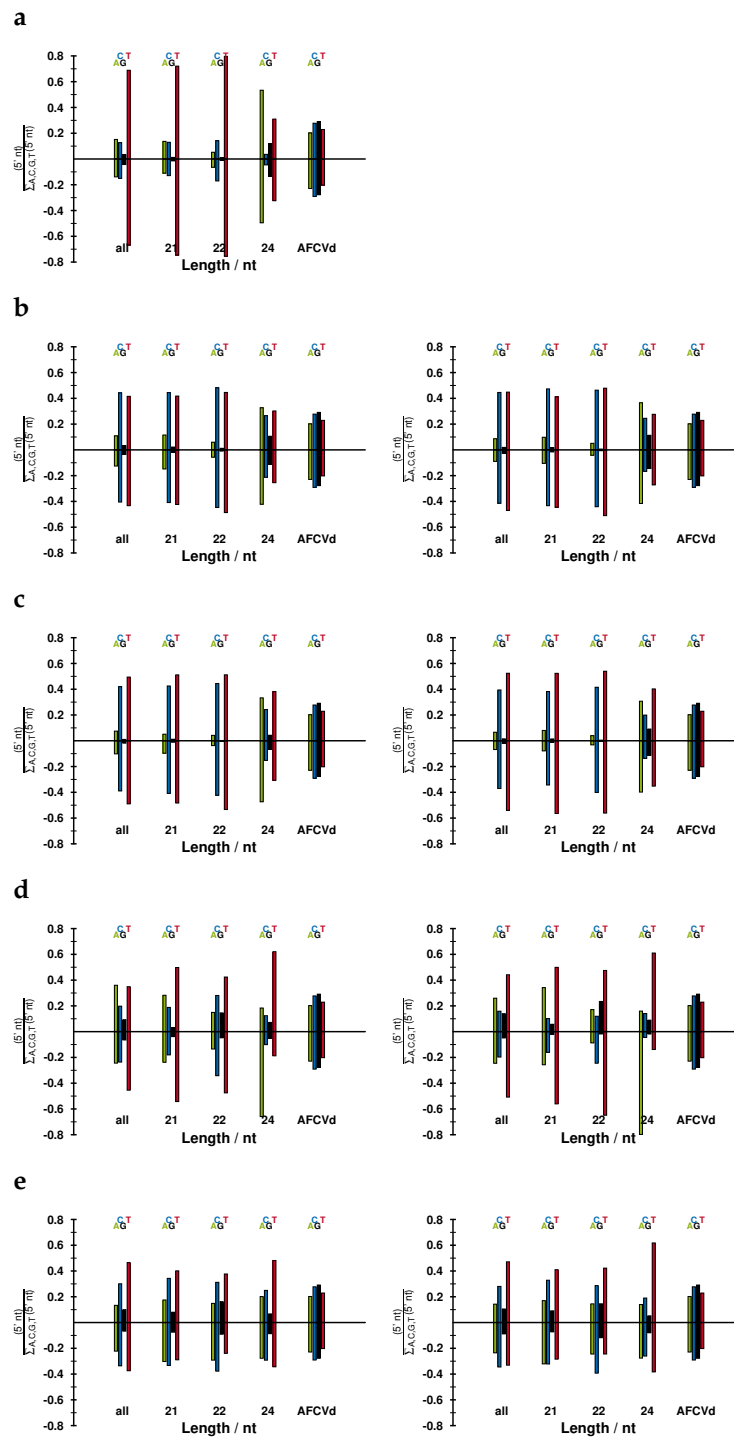

**Figure S7.** 5' end nucleotide of vd-sRNAs. Total RNA was isolated from infected leaves (a), infected pollen stages 3 (b) and 5 (c), and LAT52:AFCVd transgenic leaves (d) and LAT52:AFCVd transgenic pollen tubes (e) including biological replicates, purified and subjected to NGS using bowtie allowing for one mismatch. For further details see Figure 6.

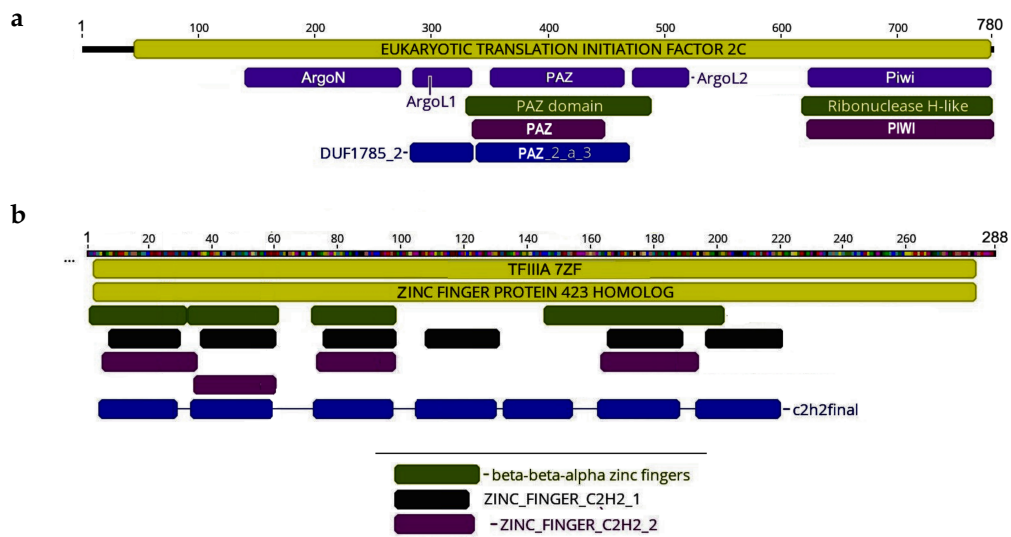

**Figure S8.** Protein domains of two factors cloned and analyzed in transient expression systems in this study. Domains were calculated and visualized using Geneious Prime 2020.04 software, Predict option using Inter Pro Scan. (a), *NtAGO5* from CBCVd transformed/infected tobacco pollen at developmental stage 3; (b), homolog of TFIIIA-7ZF isolated from *N. benthamiana* plants infected with lethal PSTVd strain AS1 [11].

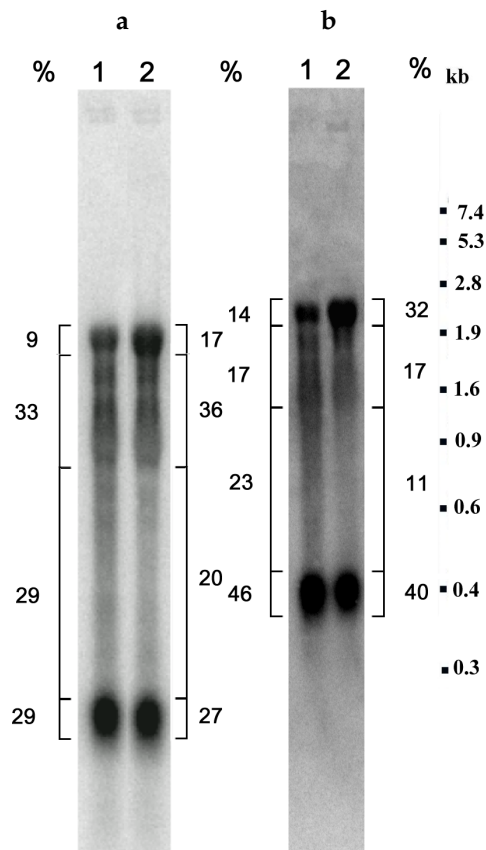

**Figure S9.** Spectrum and semiquantitative distribution of AFCVd (+)-genomic chains representing monomeric viroid and (+) replication intermediates in control-infected *N. benthamiana* leaf discs infiltrated with empty vector pJM14 (lane 1) or after co-expression of factor TFIIIA-7ZF (lane 2). Two independent experiments are shown in panels (a) and (b). Northern blot analysis was performed in 1.5% agarose gels, 20  $\mu$ g of RNA per sample were electrophoresed. After capillary transblotting to a Nylon Boddyne A membrane, nucleic were hybridized to strand-specific AFCVd(-) riboprobe to detect (+) AFCVd. Radioactivity signals were scanned and quantified using TYPHOON PhosphorImager (Amersham Biosciences, Sunnyvale, CA, USA) and quantified using ImageQuant software (Molecular Dynamics, Sunnyvale, CA, USA). The signal of individual gel zones, as indicated next to the gel slices, was calculated in percents. Positions of RNA marker in kb are shown on the right side of the panel.

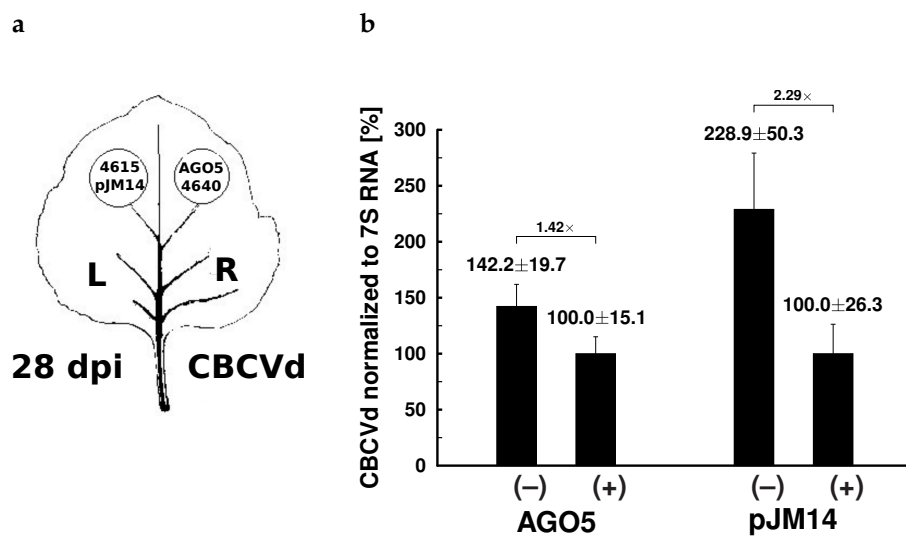

**Figure S10.** Levels of CBCVd (+) and CBCVd (-) RNA in leaf sectors of pre-infected *N. benthamiana* plants infiltrated in leaf halves either with control plant vector pJM14 or with *Nt*AGO5 cloned from developing viroid-infected pollen. After co-expression for 6 days, RNA was isolated using Concert plant reagent and purified via Qiagen columns (see Material and Methods). CBCVd was quantified using duplex strand-specific RT-qPCR (see Material and Methods). Results were normalized to 7SL RNA. (a) Scheme of infiltration; (b) results of quantification.



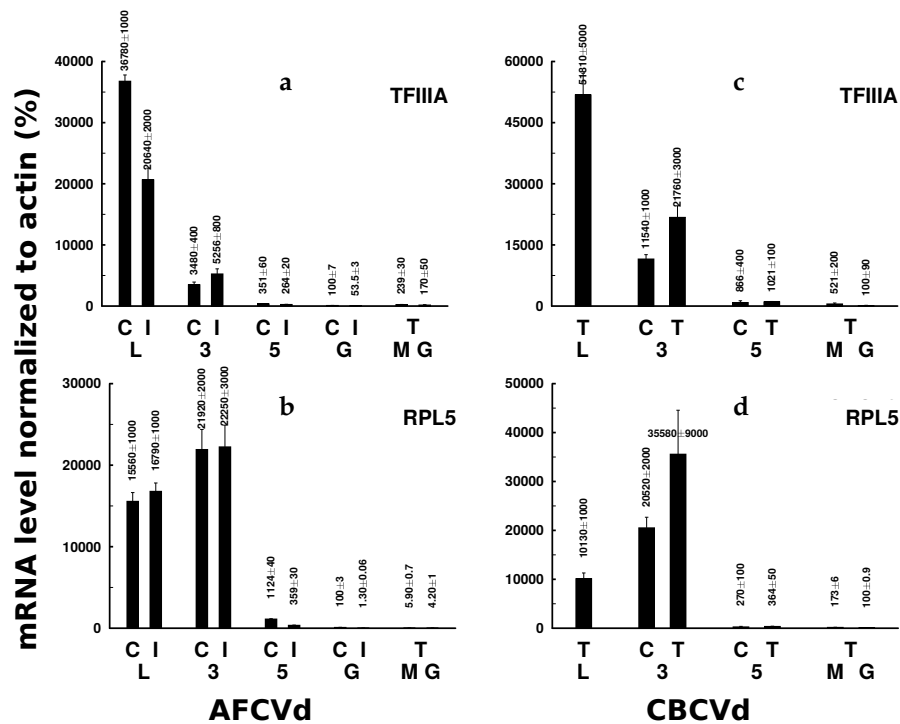

**Figure S11.** Relative mRNA levels of *NtTFIIIA* (a, c) and *NtRPL5* (b, d) that could interfere with viroid replication cycle and/or viroid propagation in pollen. Data from qPCR, as described in Material and Methods, were normalized to actin.

(a), (b): samples from AFCVd-infected or pLAT58:AFCVd-transformed plants: C, healthy, uninfected, non-transformed controls; I, AFCVd-infected; T, transformed/infected; L, young leaves; 3, 5, pollen stages 3 and 5, respectively; G, mature germinating pollen; M, mature pollen.

(c), (d): samples from 35S:CBCVd-transformed/infected plants: C, healthy, uninfected, non-transformed controls; T, transformed/infected; L, young leaves; 3, 5, pollen stages 3 and 5, respectively; M, mature pollen; G, mature germinating pollen.

## 1 References

- 2 1. Wang, Y.; Qu, J.; Ji, S.; Wallace, A.; Wu, J.; Li, Y.; Gopalan, V.; Ding, B. A land plant-specific transcription  
3 factor directly enhances transcription of a pathogenic noncoding RNA template by DNA-dependent RNA  
4 polymerase II. *Plant Cell* **2016**, *28*, 1094–1107, [<https://doi.org/10.1105/tpc.16.00100>].
- 5 2. Matoušek, J.; Siglová, K.; Jakše, J.; Radišek, S.; Brass, J.; Tsushima, T.; Guček, T.; Duraisamy, G.;  
6 Sano, T.; Steger, G. Propagation and some physiological effects of *Citrus bark cracking viroid* and  
7 *Apple fruit crinkle viroid* in multiple infected hop (*Humulus lupulus* L.). *J. Plant Physiol.* **2017**, *213*,  
8 [<https://doi.org/10.1016/j.jplph.2017.02.014>].
- 9 3. Gibalová, A.; Steinbachová, L.; Hafidh, S.; Bláhová, V.; Gadiou, Z.; Michailidis, C.; Müller,  
10 K.; Pleskot, R.; Dupl'áková, N.; Honys, D. Characterization of pollen-expressed bZIP protein  
11 interactions and the role of ATbZIP18 in the male gametophyte. *Plant Reprod.* **2016**, *30*, 1–17,  
12 [<https://doi.org/10.1007/s00497-016-0295-5>].
- 13 4. Haseloff, J.; Siemerling, K.; Prasher, D.; Hodge, S. Removal of a cryptic intron and subcellular localization  
14 of green fluorescent protein are required to mark transgenic *Arabidopsis* plants brightly. *Proc. Natl. Acad.*  
15 *Sci. USA* **1997**, *94*, 2122–2127, [<https://doi.org/10.1073/pnas.94.6.2122>].
- 16 5. Matoušek, J.; Kocábek, T.; Patzak, J.; Füßy, Z.; Procházková, J.; Heyerick, A. Combinatorial analysis  
17 of lupulin gland transcription factors from R2R3Myb, bHLH and WDR families indicates a complex  
18 regulation of *chs\_H1* genes essential for prenylflavonoid biosynthesis in hop (*Humulus lupulus* L.). *BMC*  
19 *Plant Biol.* **2012**, *12*, 27, [<https://doi.org/10.1186/1471-2229-12-27>].
- 20 6. Matoušek, J.; Junker, V.; Vrba, L.; Schubert, J.; Patzak, J.; Steger, G. Molecular characterization and  
21 genome organization of 7SL RNA genes from hop (*Humulus lupulus* L.). *Gene* **1999**, *239*, 173–183,  
22 [[https://doi.org/10.1016/S0378-1119\(99\)00352-2](https://doi.org/10.1016/S0378-1119(99)00352-2)].
- 23 7. Matoušek, J.; Kocábek, T.; Patzak, J.; Bříza, J.; Siglová, K.; Mishra, A.; Duraisamy, G.; Týcová, A.; Ono, E.;  
24 Krofta, K. The “putative” role of transcription factors from HIWRKY family in the regulation of the final  
25 steps of prenylflavonoid and bitter acids biosynthesis in hop (*Humulus lupulus* L.). *Plant Mol. Biol.* **2016**,  
26 *92*, 263–277, [<https://doi.org/10.1007/s11103-016-0510-7>].
- 27 8. Baulcombe, D.; Molnár, A. Crystal structure of p19—a universal suppressor of RNA silencing. *Trends*  
28 *Biochem. Sci.* **2004**, *29*, 279–281, [<https://doi.org/10.1016/j.tibs.2004.04.007>].
- 29 9. Bolger, A.; Lohse, M.; Usadel, B. Trimmomatic: a flexible trimmer for Illumina sequence data. *Bioinformatics*  
30 **2014**, *30*, 2114–20, [<https://doi.org/10.1093/bioinformatics/btu170>].
- 31 10. Langmead, B.; Trapnell, C.; Pop, M.; Salzberg, S. Ultrafast and memory-efficient alignment of short DNA  
32 sequences to the human genome. *Genome Biol.* **2009**, *10*, R25, [<https://doi.org/10.1186/gb-2009-10-3-r25>].
- 33 11. Matoušek, J.; Kozlová, P.; Orctová, L.; Schmitz, A.; Pešina, K.; Bannach, O.; Diermann, D.; Steger, G.;  
34 Riesner, D. Accumulation of viroid-specific small RNAs and increase of nucleolytic activities linked to  
35 viroid-caused pathogenesis. *Biol. Chem.* **2007**, *388*, 1–13, [<https://doi.org/10.1515/BC.2007.001>].
